# Supplementary material for: Dissecting of the Deterioration in Eating Quality for Erect Panicle (Ep) Type High Yield Japonica Super Rice in Northest China
Source: Research Square preprint supplement (doi:10.21203/rs.3.rs-1146132/v1), 2021-12-09
Supplement: Supplementary file 1 [file 6adc6ab6162c20b15077ea23.doc]

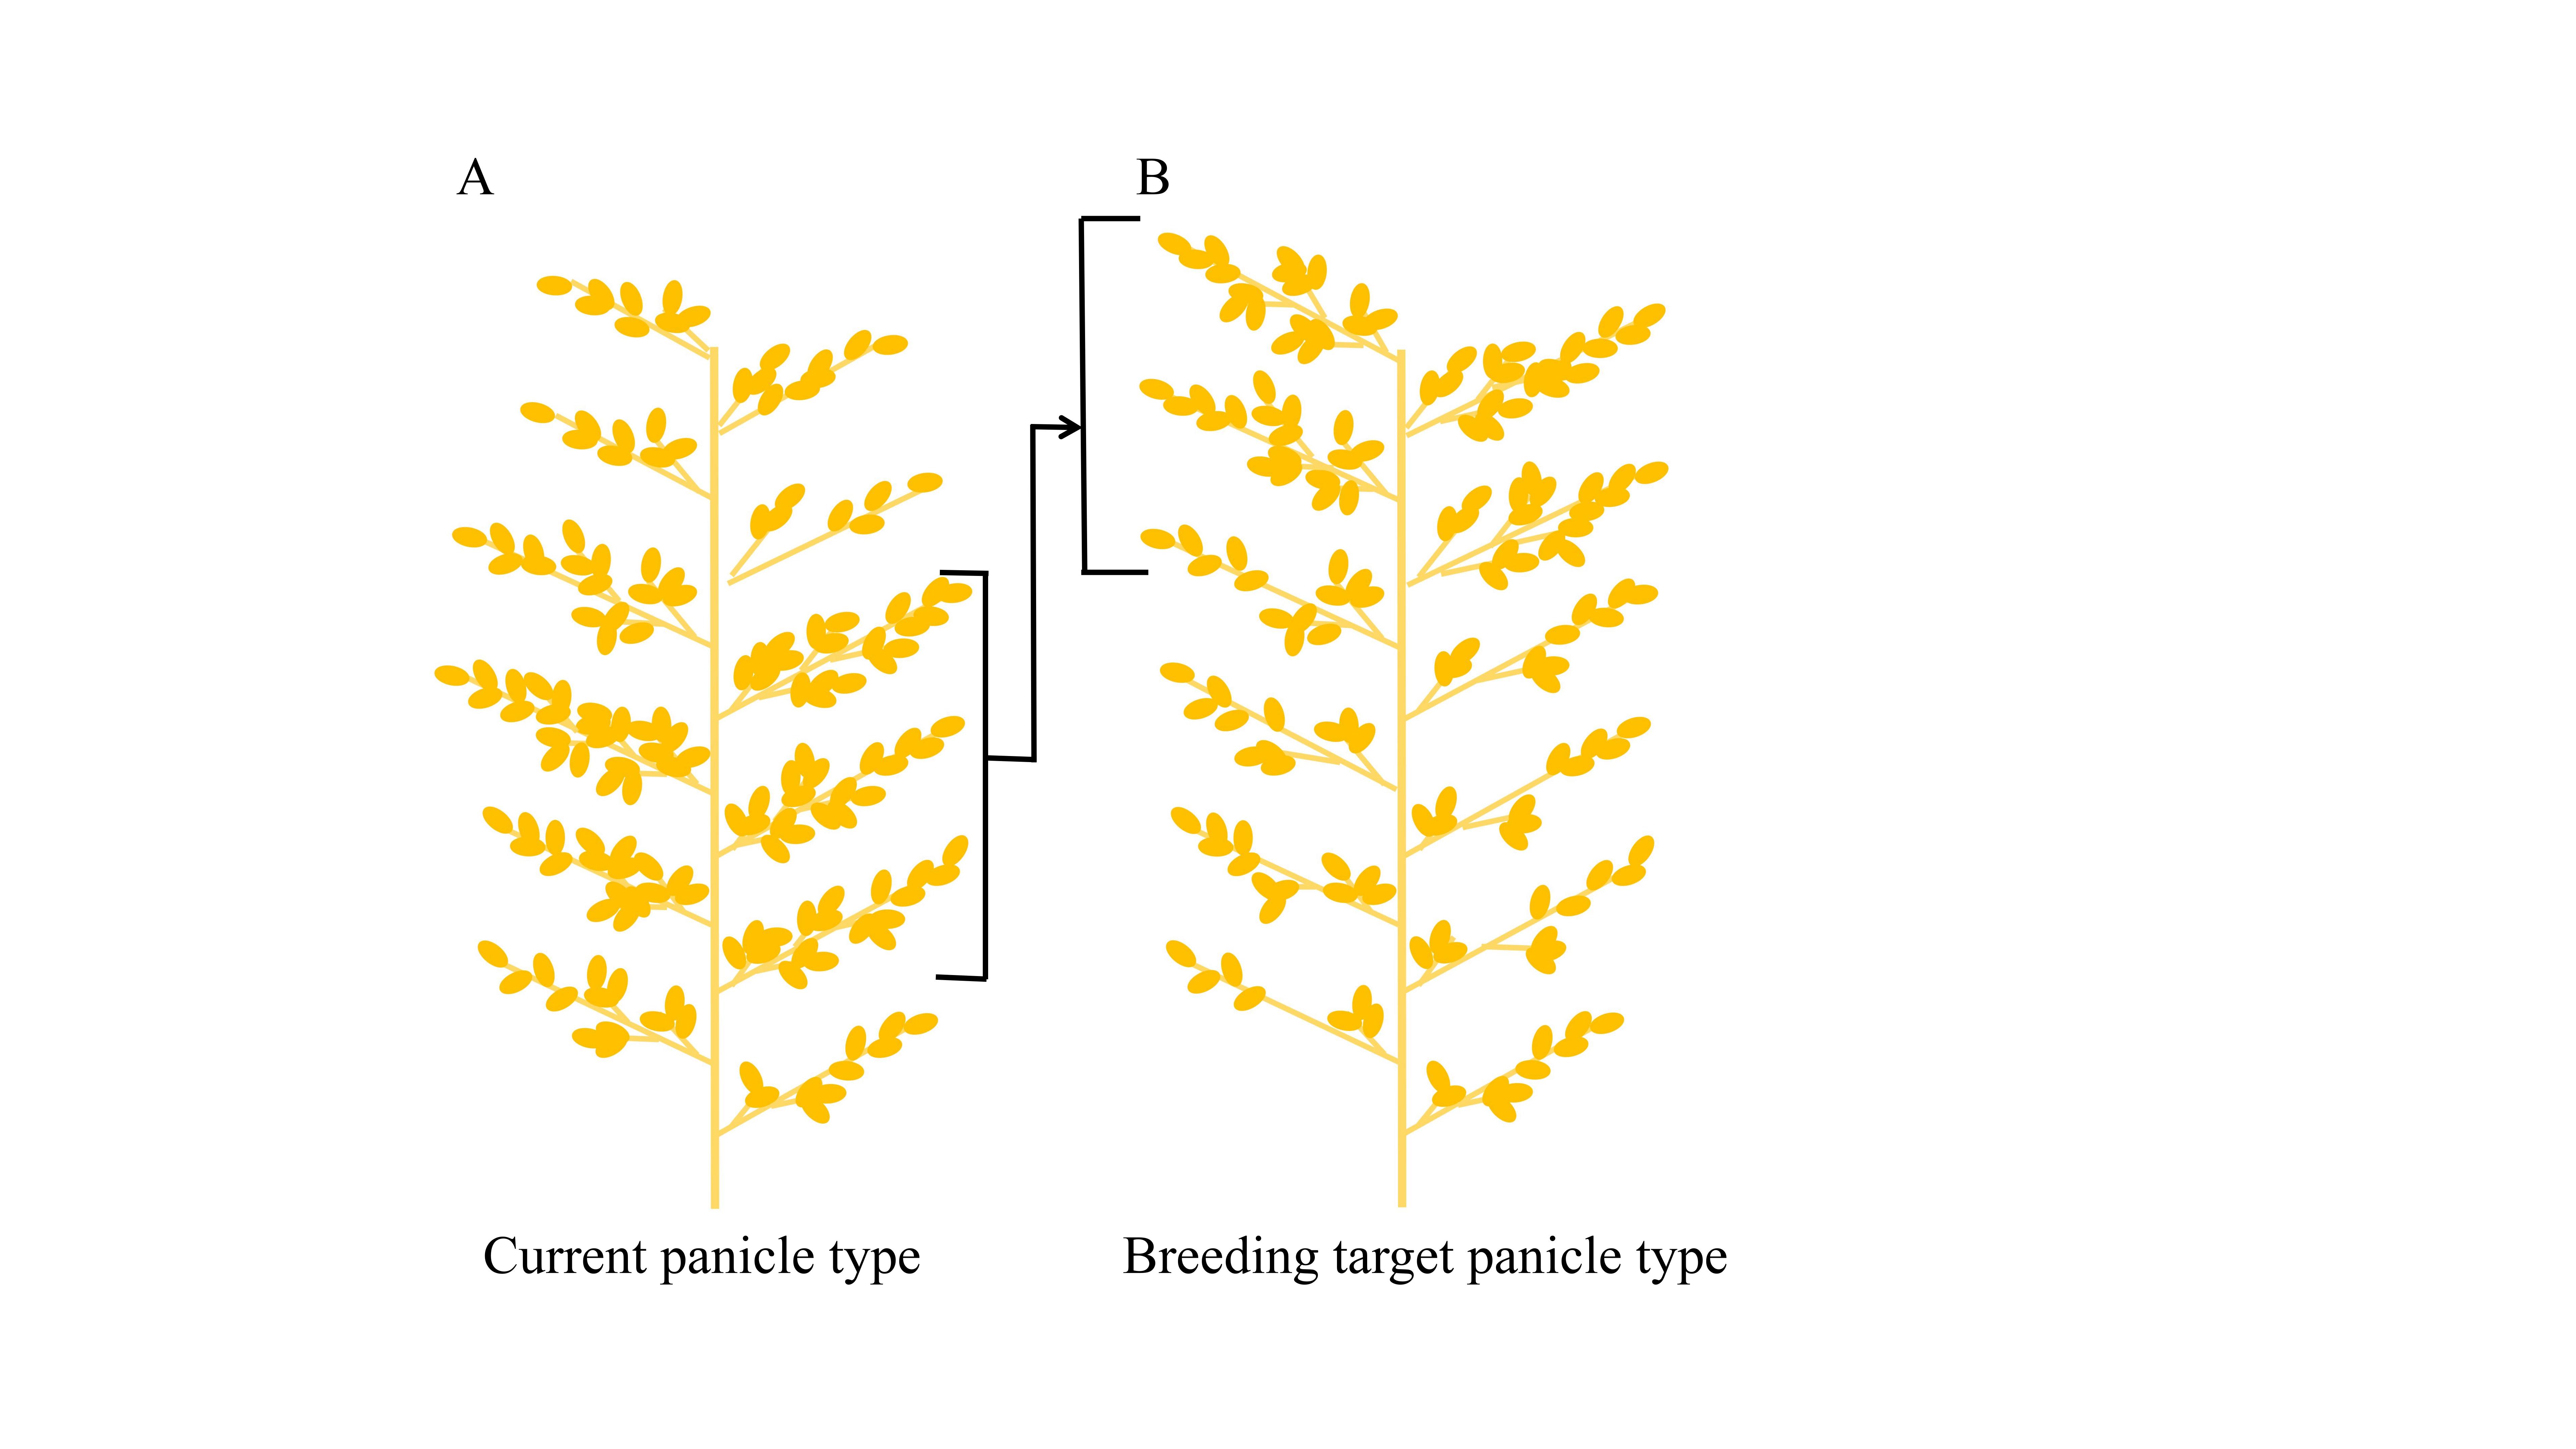


**S.Fig. 2-**The schematic diagram of comparison between current panicle type and breeding target panicle type.
